# Supplementary material for: Microwave-assisted rapid synthesis of mesoporous nanostructured ZnCo2O4 anode materials for high-performance lithium-ion batteries
Source: Royal Society of Chemistry journal article supplement (doi:10.1039/c5ta06949a), 2015-01-01
Supplement: c5ta06949a1.pdf [file c5ta06949a1.pdf]

*Supplementary Information*

**Microwave-assisted rapid synthesis of mesoporous nanostructured ZnCo<sub>2</sub>O<sub>4</sub> anode material for high-performance lithium-ion batteries**

Yanjie Wang,<sup>a,b</sup> Jun Ke,<sup>b</sup> Yawen Zhang,<sup>b</sup> and Yunhui Huang<sup>a,\*</sup>

<sup>a</sup> *State Key Laboratory of Materials Processing and Die & Mould Technology, School of Materials Science and Engineering, Huazhong University of Science and Technology, Wuhan, Hubei 430074, China. Fax: +86-27-8755241; Tel: +86-27-87558241; E-mail: [huangyh@hust.edu.cn](mailto:huangyh@hust.edu.cn).*

<sup>b</sup> *State Key Laboratory of Rare Earth Materials Chemistry and Applications, Peking University, Beijing 100871, China.*

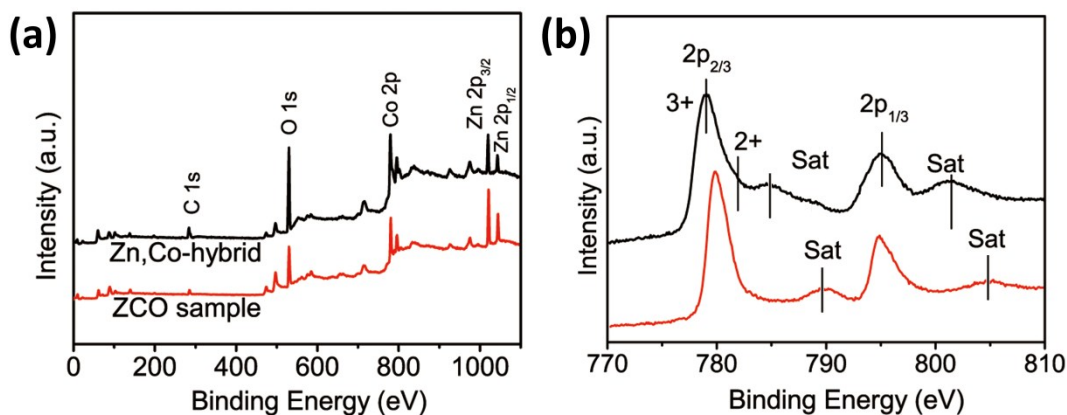

**Fig. S1.** (a) XPS spectra of the (Zn,Co)-organic hybrid precursor and the ZCO sample; (b) Co 2p XPS spectra of the (Zn,Co)-organic hybrid precursor and the ZCO sample.

As shown in Fig. S1a, XPS spectra indicate the presence of Zn, Co, and O in both (Zn,Co)-organic precursor and ZCO sample. From Fig. S1b, we can see that Co 2p spectrum of the ZCO sample has two major peaks with binding energy at 780.3 (Co 2p<sub>3/2</sub>) and 795.3 eV (Co 2p<sub>1/2</sub>) with a spin-orbit splitting of 15.0 eV, which are accompanied by two weak shake-up satellite peaks at 790.0 and 805.0 eV; the energy gap between the Co 2p main peaks and the satellite peaks is about 9.7 eV. Different from Co 2p spectrum of the ZCO sample, the energy gap between Co 2p main peaks and the satellite peaks in the Co 2p spectrum of the (Zn,Co)-organic hybrid precursor is about 5.0 eV. Generally, if the energy gap is 9-10 eV, the Co cation valence is mainly assigned the value of +3. After refined fitting, the valence of Co ions in the ZCO sample is mainly +3, while some Co<sup>2+</sup> ions exist in the (Zn,Co)-organic precursor.

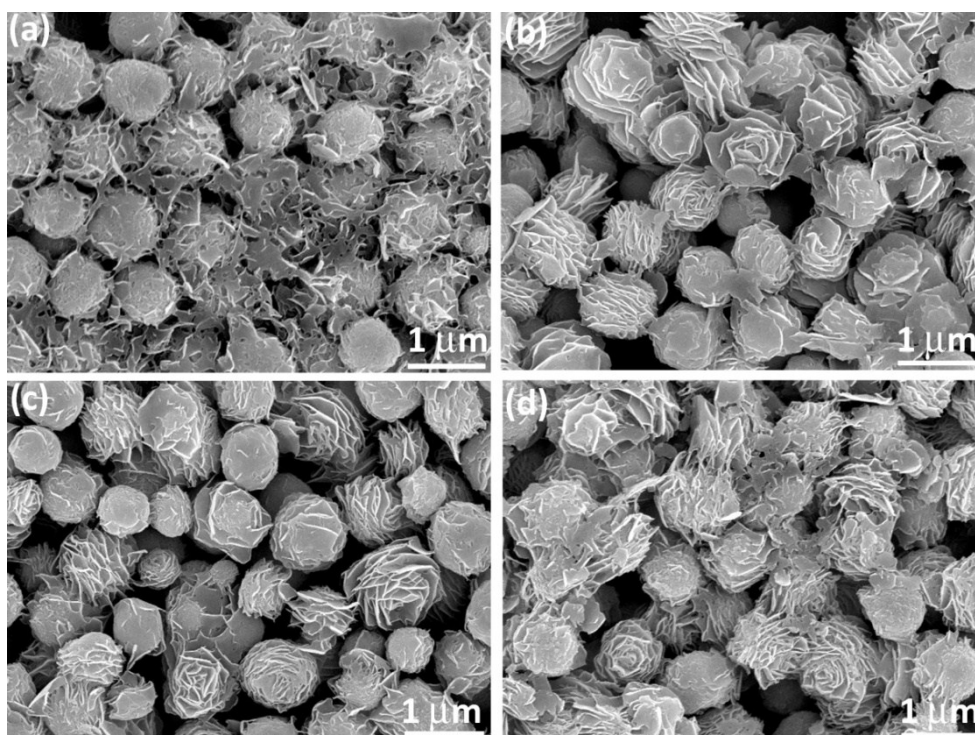

**Fig. S2.** SEM images of (Zn,Co)-organic precursor prepared under different reaction time: (a) 1 min, (b) 5 min, (c) 10 min, and (d) 20 min.

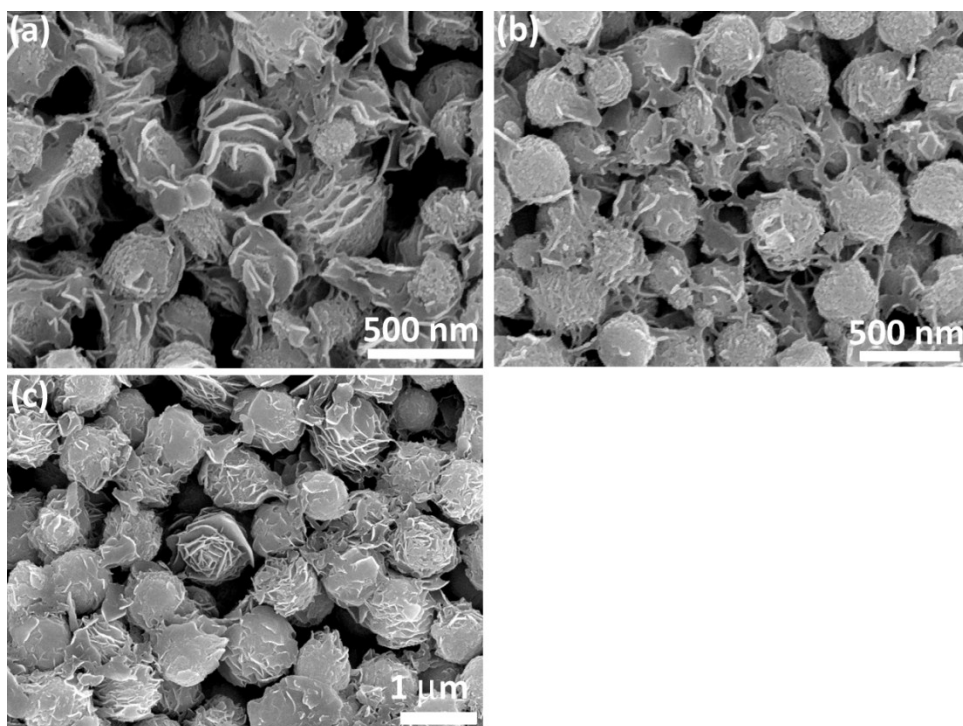

**Fig. S3.** SEM images of the (Zn,Co)-organic precursor prepared with different usage of H<sub>2</sub>O (volume): (a) 200 μL, (b) 400 μL, and (c) 800 μL.

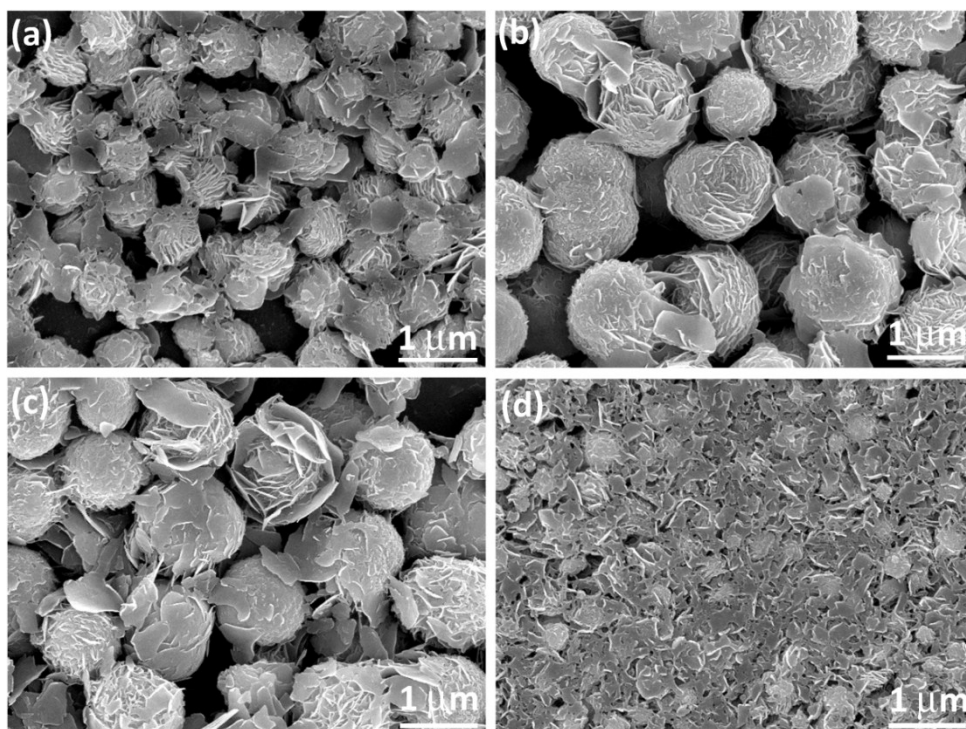

**Fig. S4.** SEM images of (Zn,Co)-organic precursor prepared with different usage of butylamine (volume): (a) 0  $\mu\text{L}$ , (b) 25  $\mu\text{L}$ , (c) 50  $\mu\text{L}$ , and (d) 100  $\mu\text{L}$ .

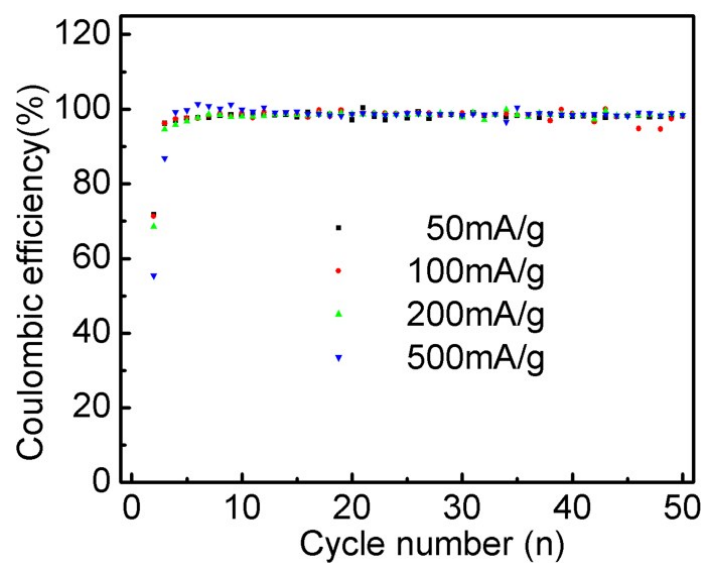

**Fig. S5.** Coulombic efficiency of the as-prepared ZCO electrode in the voltage range of 0.01–3.0 V at current densities from 50 to 500  $\text{mA g}^{-1}$ .

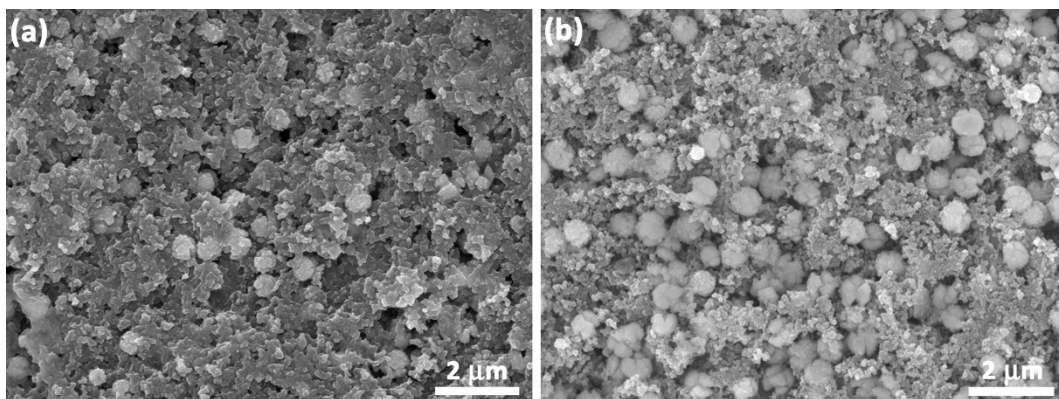

**Fig. S6.** SEM images of the ZCO electrode: (a) before and (b) after 50 charge/discharge cycles at a current density of 50 mA g<sup>-1</sup>.
